# Supplementary material for: Effect of Compound Kushen Injection, a natural compound mixture, and its identified chemical components on migration and invasion of colon, brain and breast cancer cell lines
Source: bioRxiv or medRxiv preprint supplement (doi:10.1101/500124), 2018-12-19

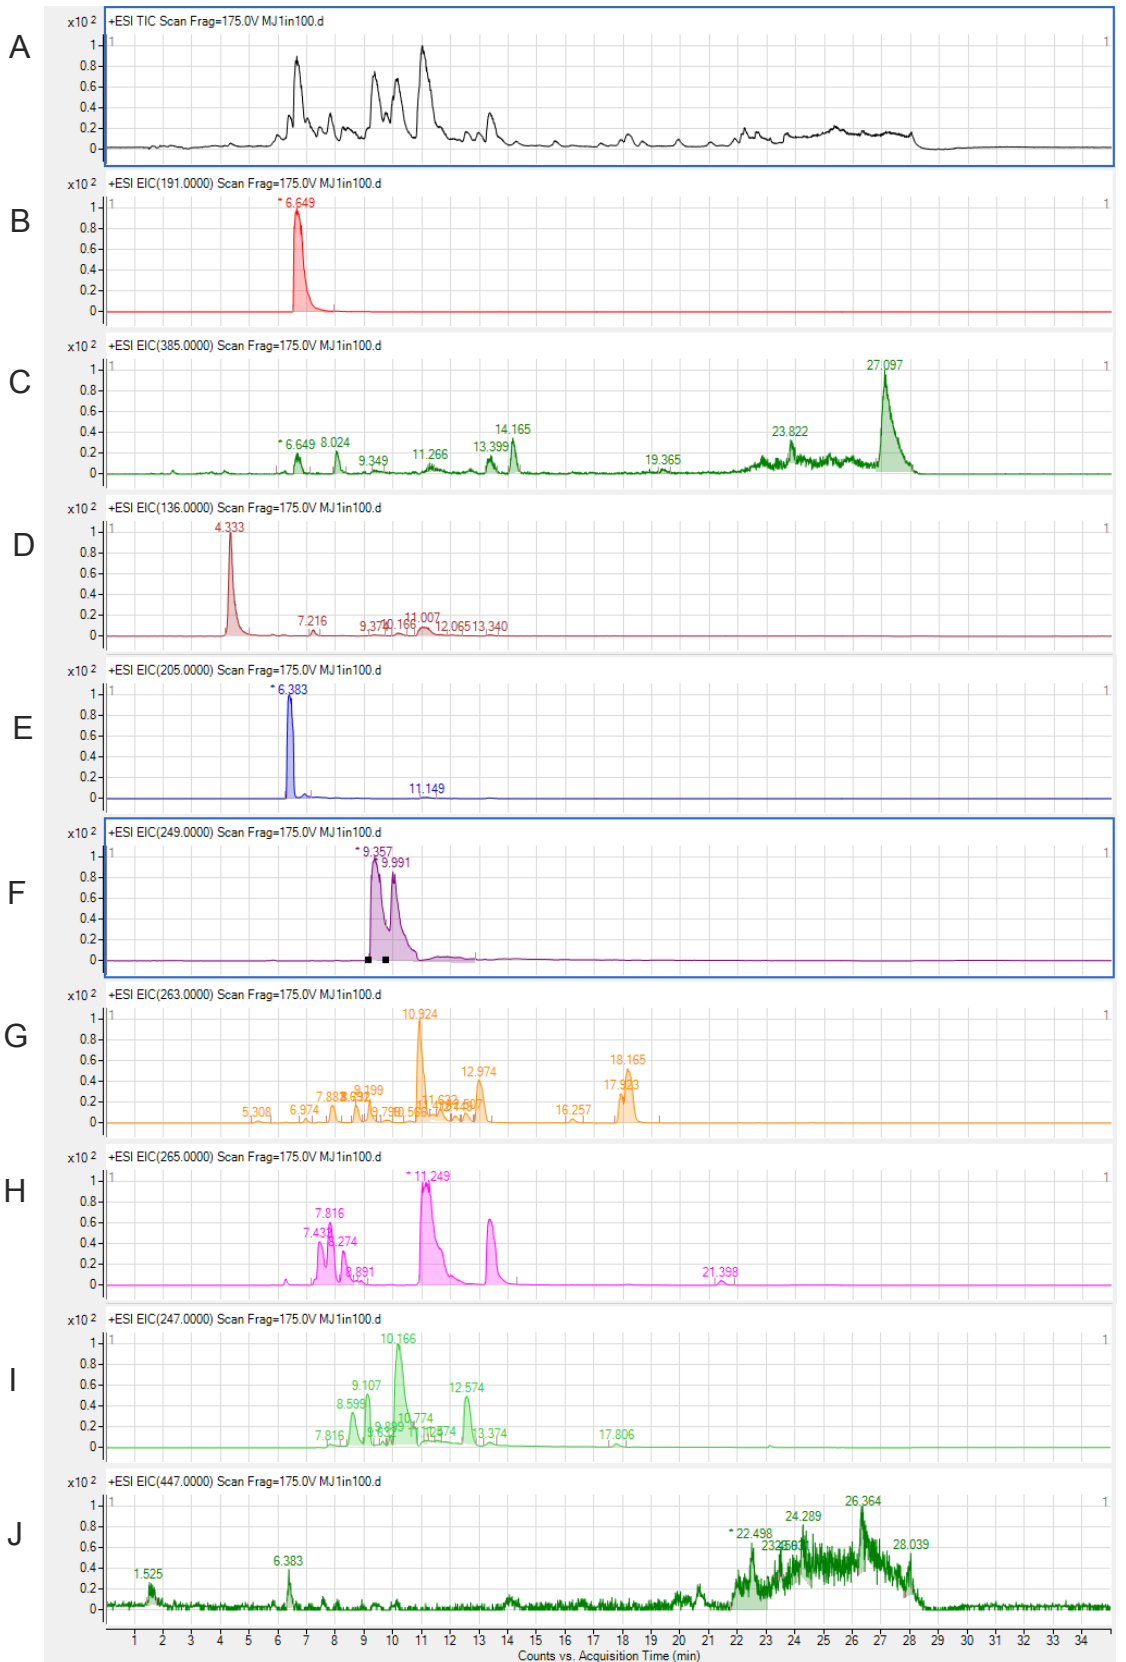

Supplement: Supplementary file [file media-7.pdf]
